# Supplementary material for: Complete digestion of edible bird's nest releases freeN-acetylneuraminic acid and small peptides: an efficient method to improve functional properties
Source: Royal Society of Chemistry journal article supplement (doi:10.1039/c8fo00991k), 2018-01-01
Supplement: c8fo00991k2.pdf [file c8fo00991k2.pdf]

### Supporting Information.

#### Fig. S1. Cell viability in cell cultures.

The EBN crude extract **(A)** or SGF digest **(B)** were applied onto cultured B16 murine melanoma, seeded on 6-well plate and cultured in DMEM supplemented with 10% fetal bovine serum. The cells were treated with the dose (10-1,000 µg/mL) of White, Yellow and Red EBN samples for 48 hours. Cell viability was performed by cell count. **(C)** Cultured MG-63 cells, or rat osteoblasts, were treated with EBN extract or digest (10-1,000 µg/mL) for 48 hours and then were performed cell proliferation assays (MTT assay). Dexamethasone (Dex; 50 nM) together with Vitamin C (VC; 250 µM) was used as a positive control. Values are expressed in % of the total control cell, Means ± SEM ( $n = 4$ ), each with triplicate samples.
