# Supplementary figures and images for: Complete digestion of edible bird's nest releases freeN-acetylneuraminic acid and small peptides: an efficient method to improve functional properties
Source: Royal Society of Chemistry journal article supplement (doi:10.1039/c8fo00991k), 2018-01-01

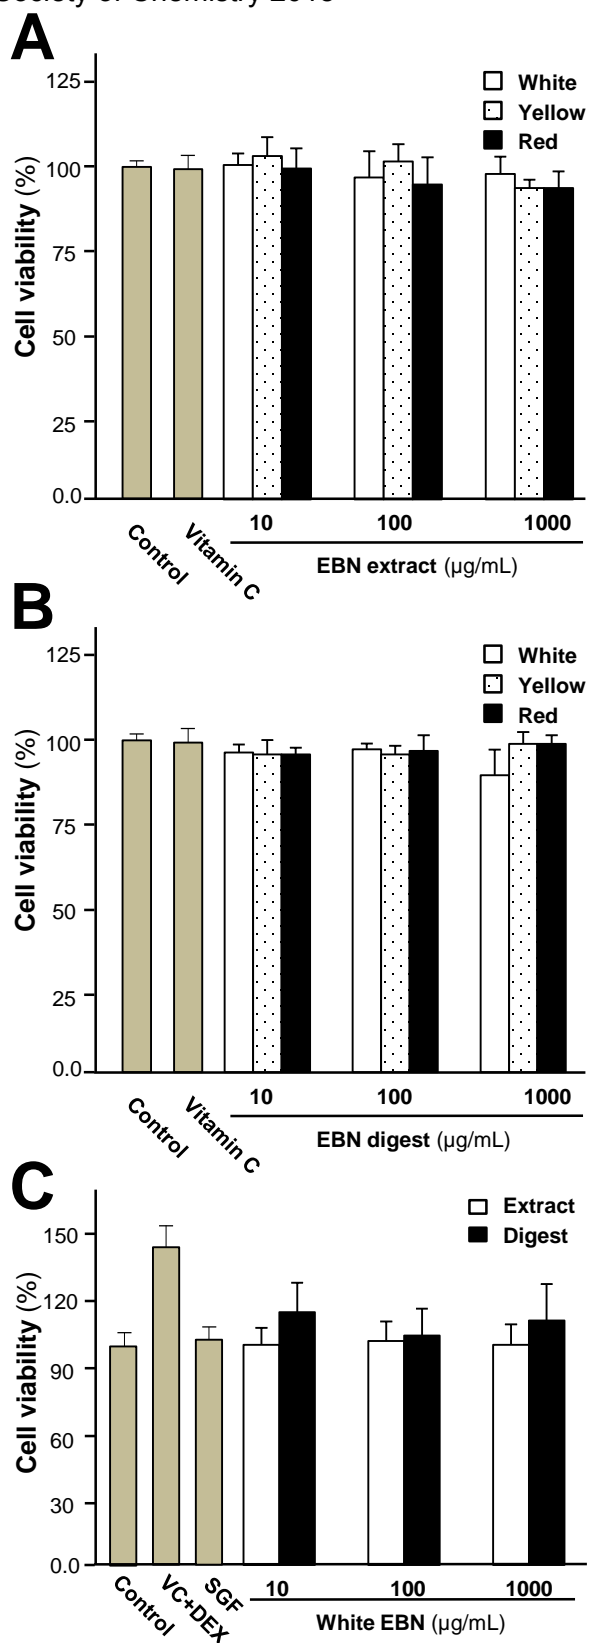

**Fig.S1**  
Wong et al 2018

Supplement: c8fo00991k1.pdf [file c8fo00991k1.pdf]
